# Supplementary material
Source: PubMed Central journal article supplement (PMC3606680)

**Antiproliferative and antiplasmodial dimeric phloroglucinols from *Mallotus oppositifolius* from the Madagascar Dry Forest**

Liva Harinantenaina, Jessica D. Bowman, Peggy J. Brodie, Carla Slebodnick, Martin W. Callmander, Etienne Rakotobe, Richard Randrianaivo, Vincent E. Rasamison, Alexander Gorke, Paul D. Roepe, Maria B. Cassera, and David G. I. Kingston

***Supporting Information***

1. Title page
2.  $^1\text{H}$  spectrum of compound **1**.
3.  $^{13}\text{C}$  NMR spectrum of compound **1**.
4.  $^1\text{H}$  spectrum of compound **2**.
5.  $^{13}\text{C}$  NMR spectrum of compound **2**.
6.  $^1\text{H}$  spectrum of compound **4**.
7. Mass spectrum of compound **4**.
8. Anisotropic displacement ellipsoid drawing (50%) of compound **3**.



Compound 1

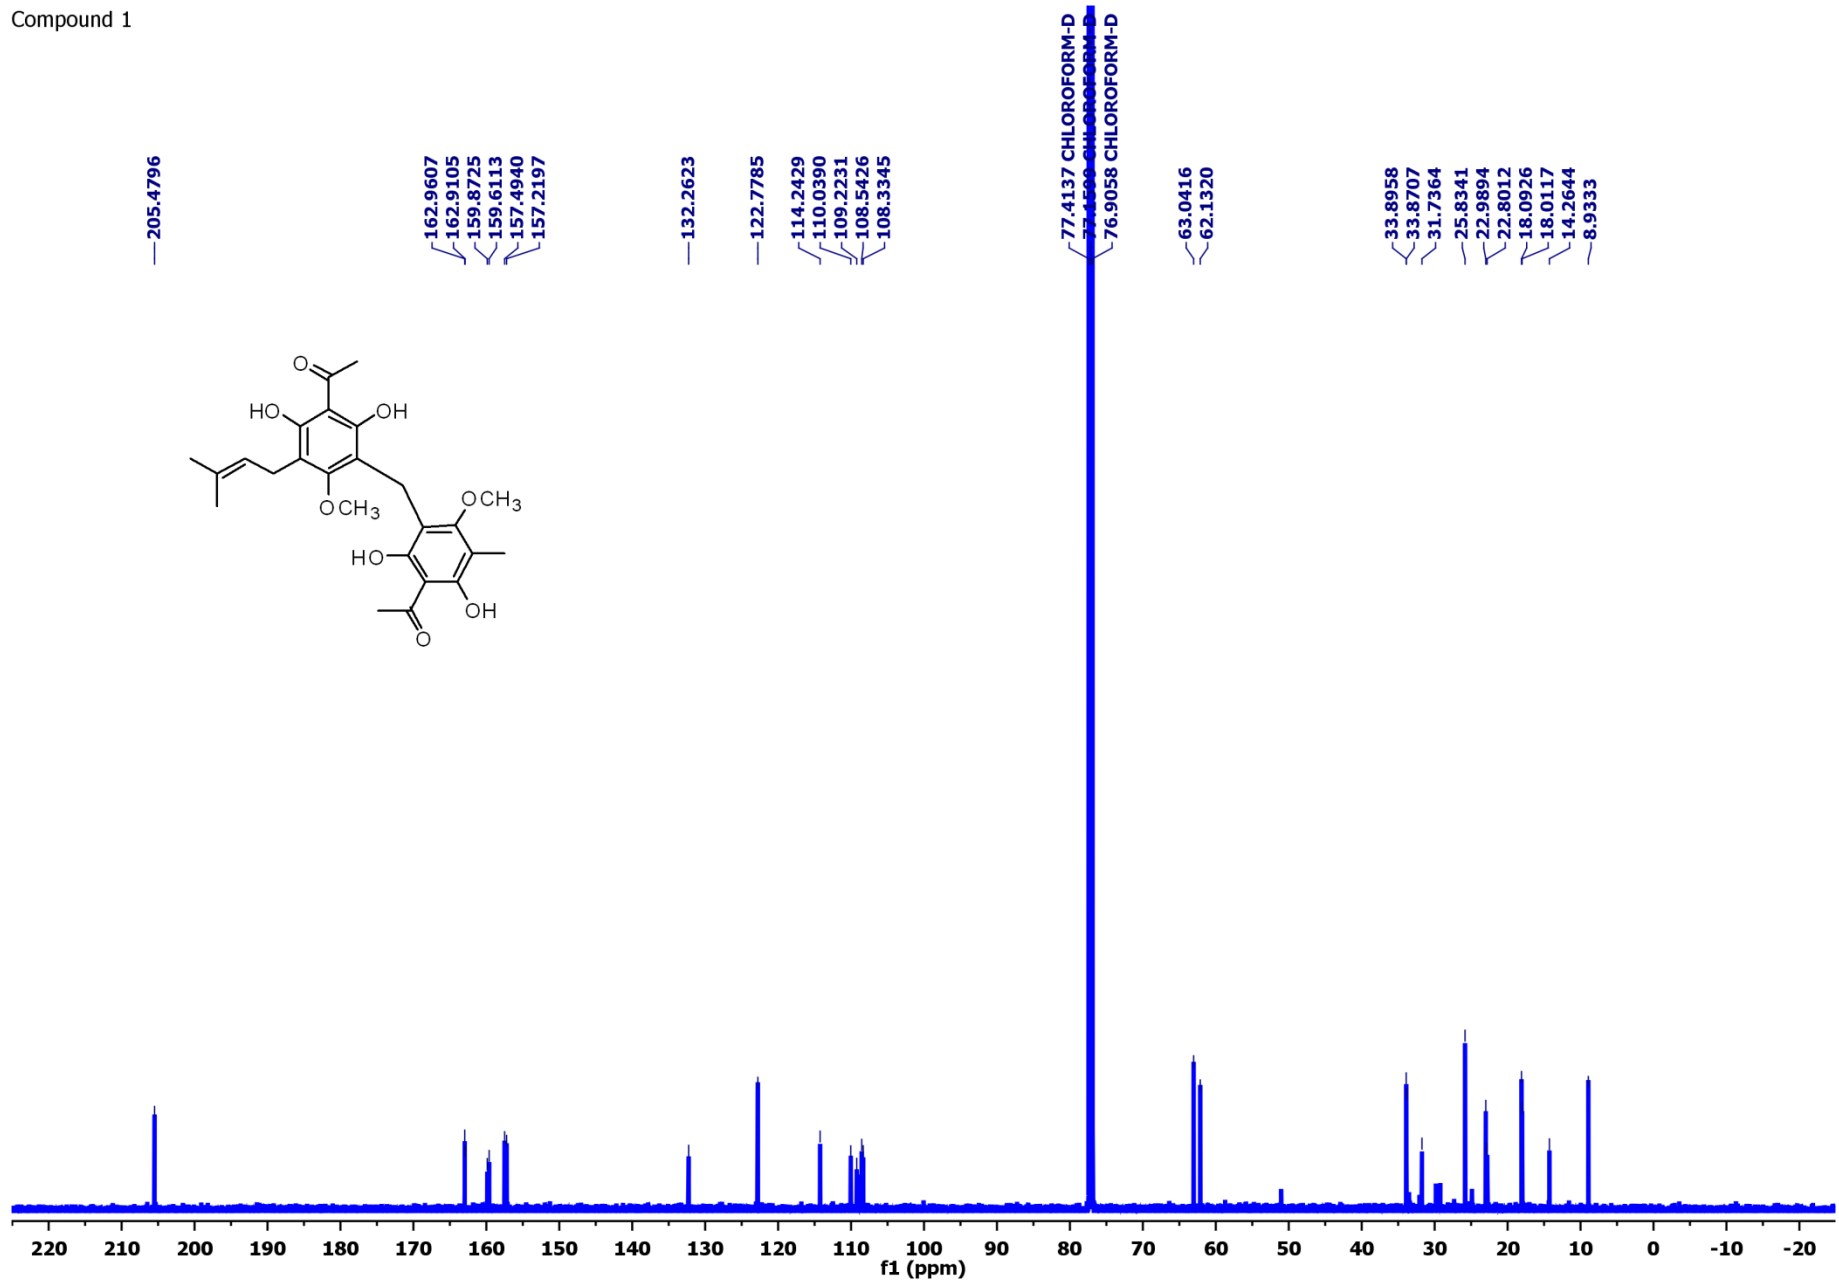

# Chart 3. <sup>1</sup>H-NMR spectrum of Compound 2

Compound 2

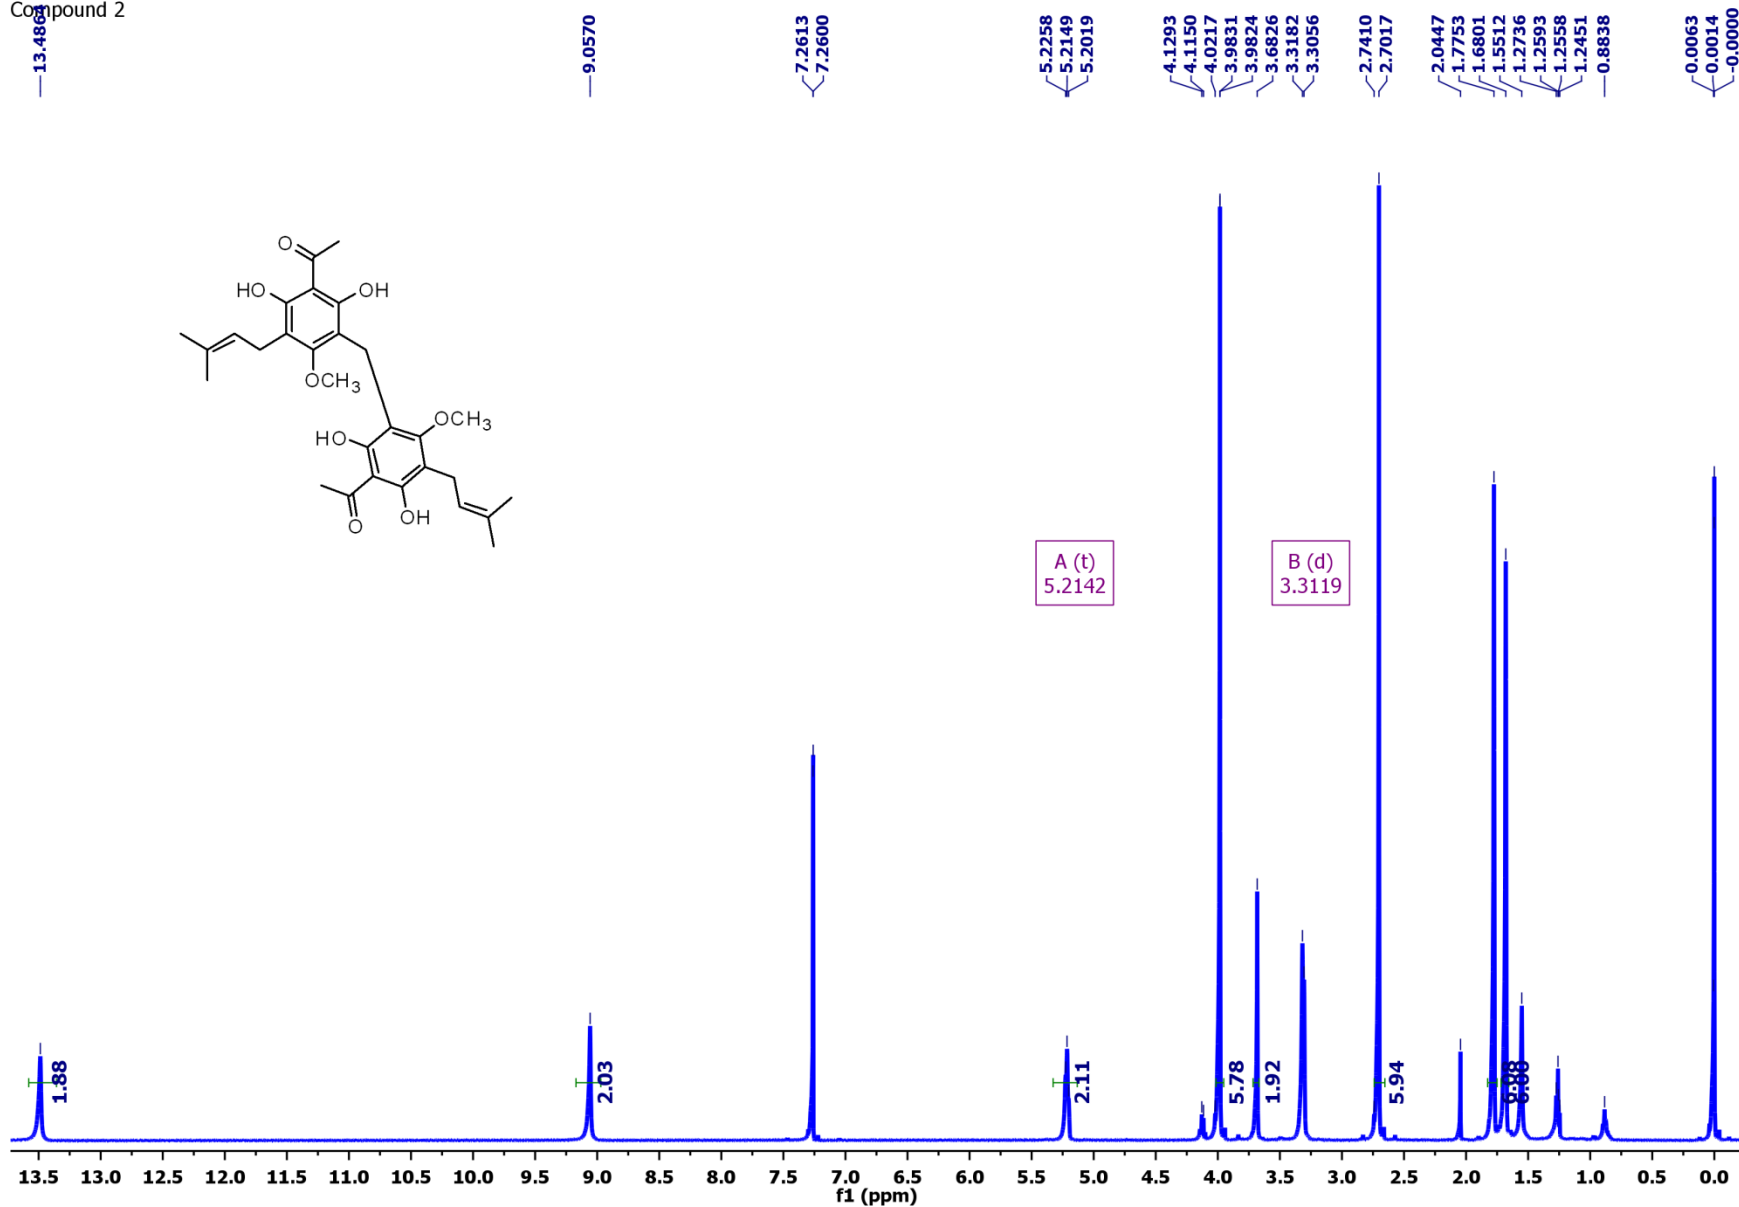

Chart 4.  $^{13}\text{C}$ -NMR spectrum of Compound 2

Compound 2

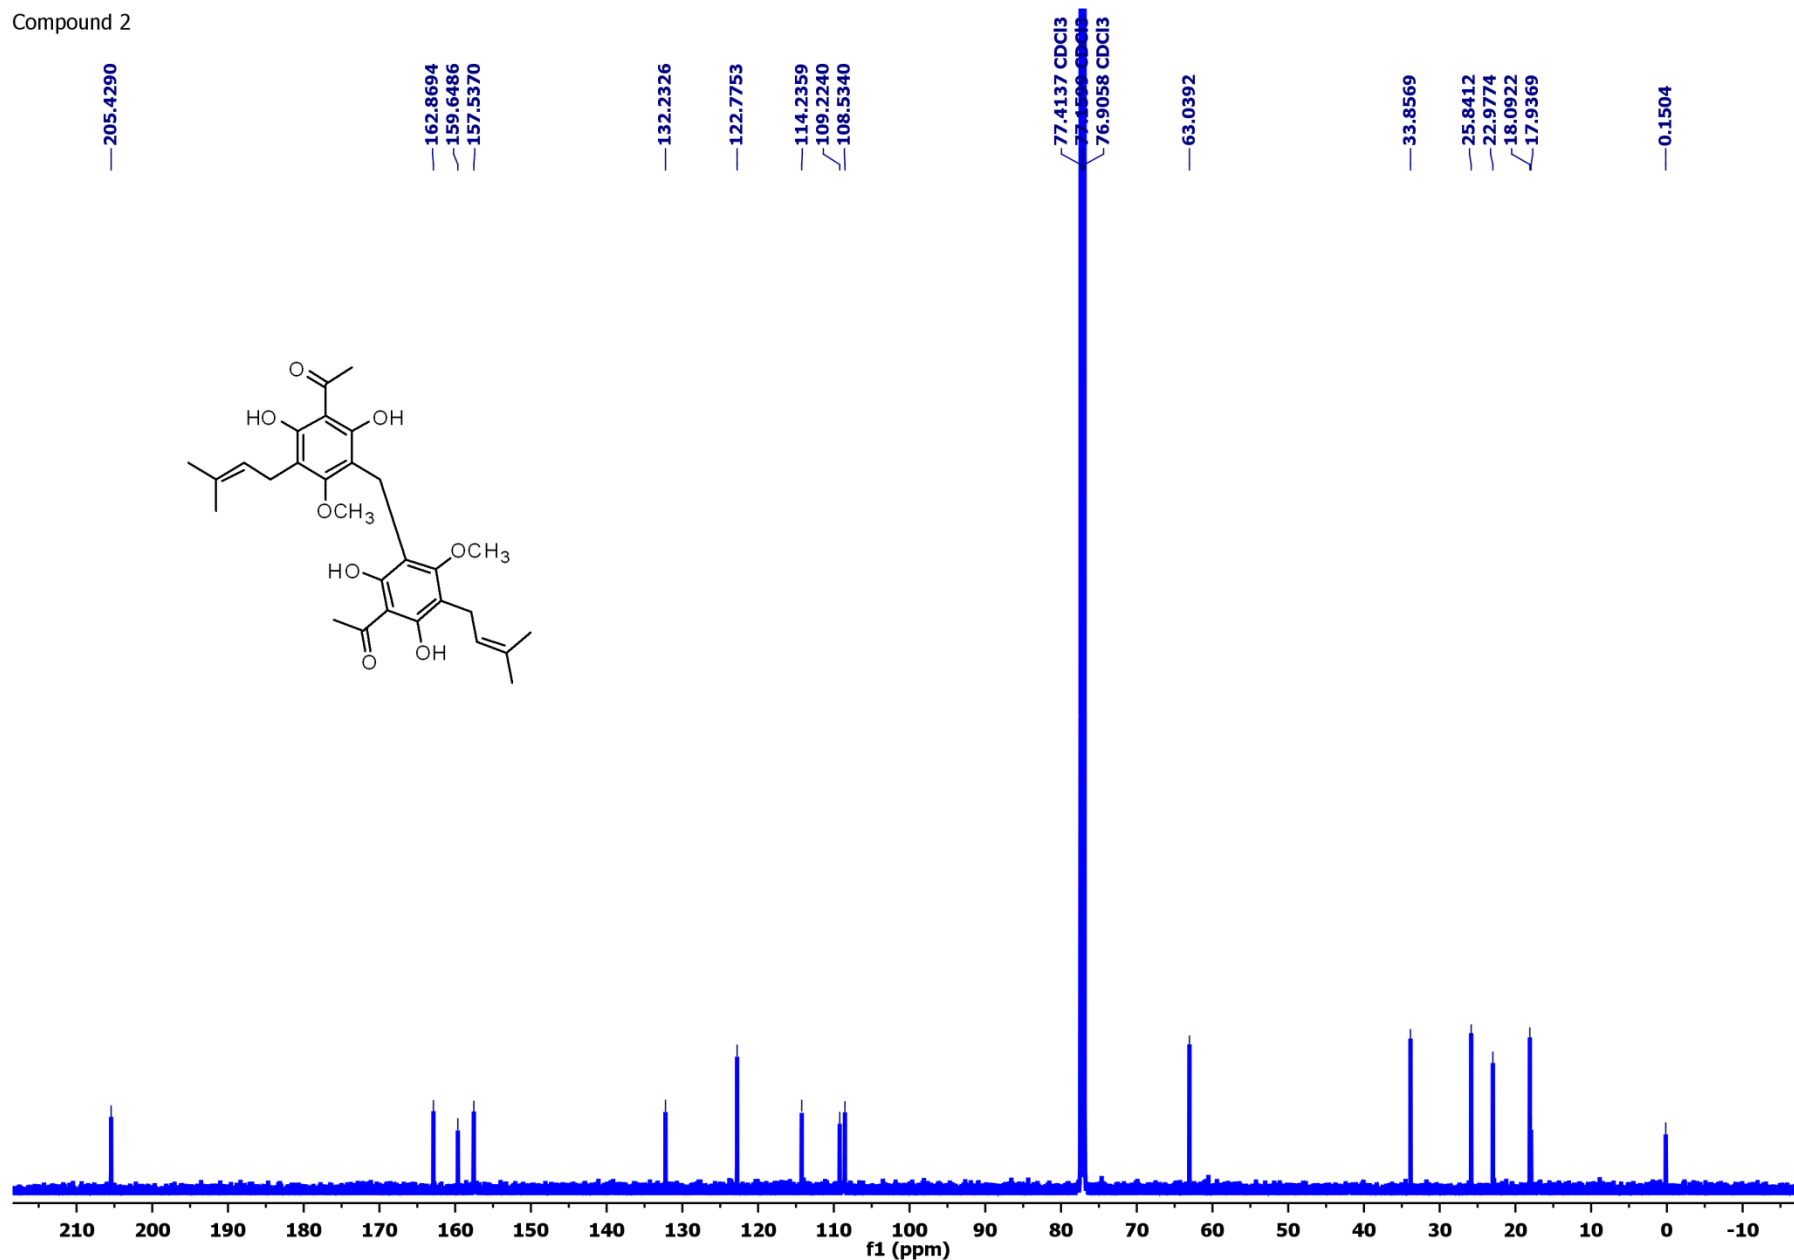

# Chart 5. $^1\text{H-NMR}$ spectra of Compounds 2 and 4

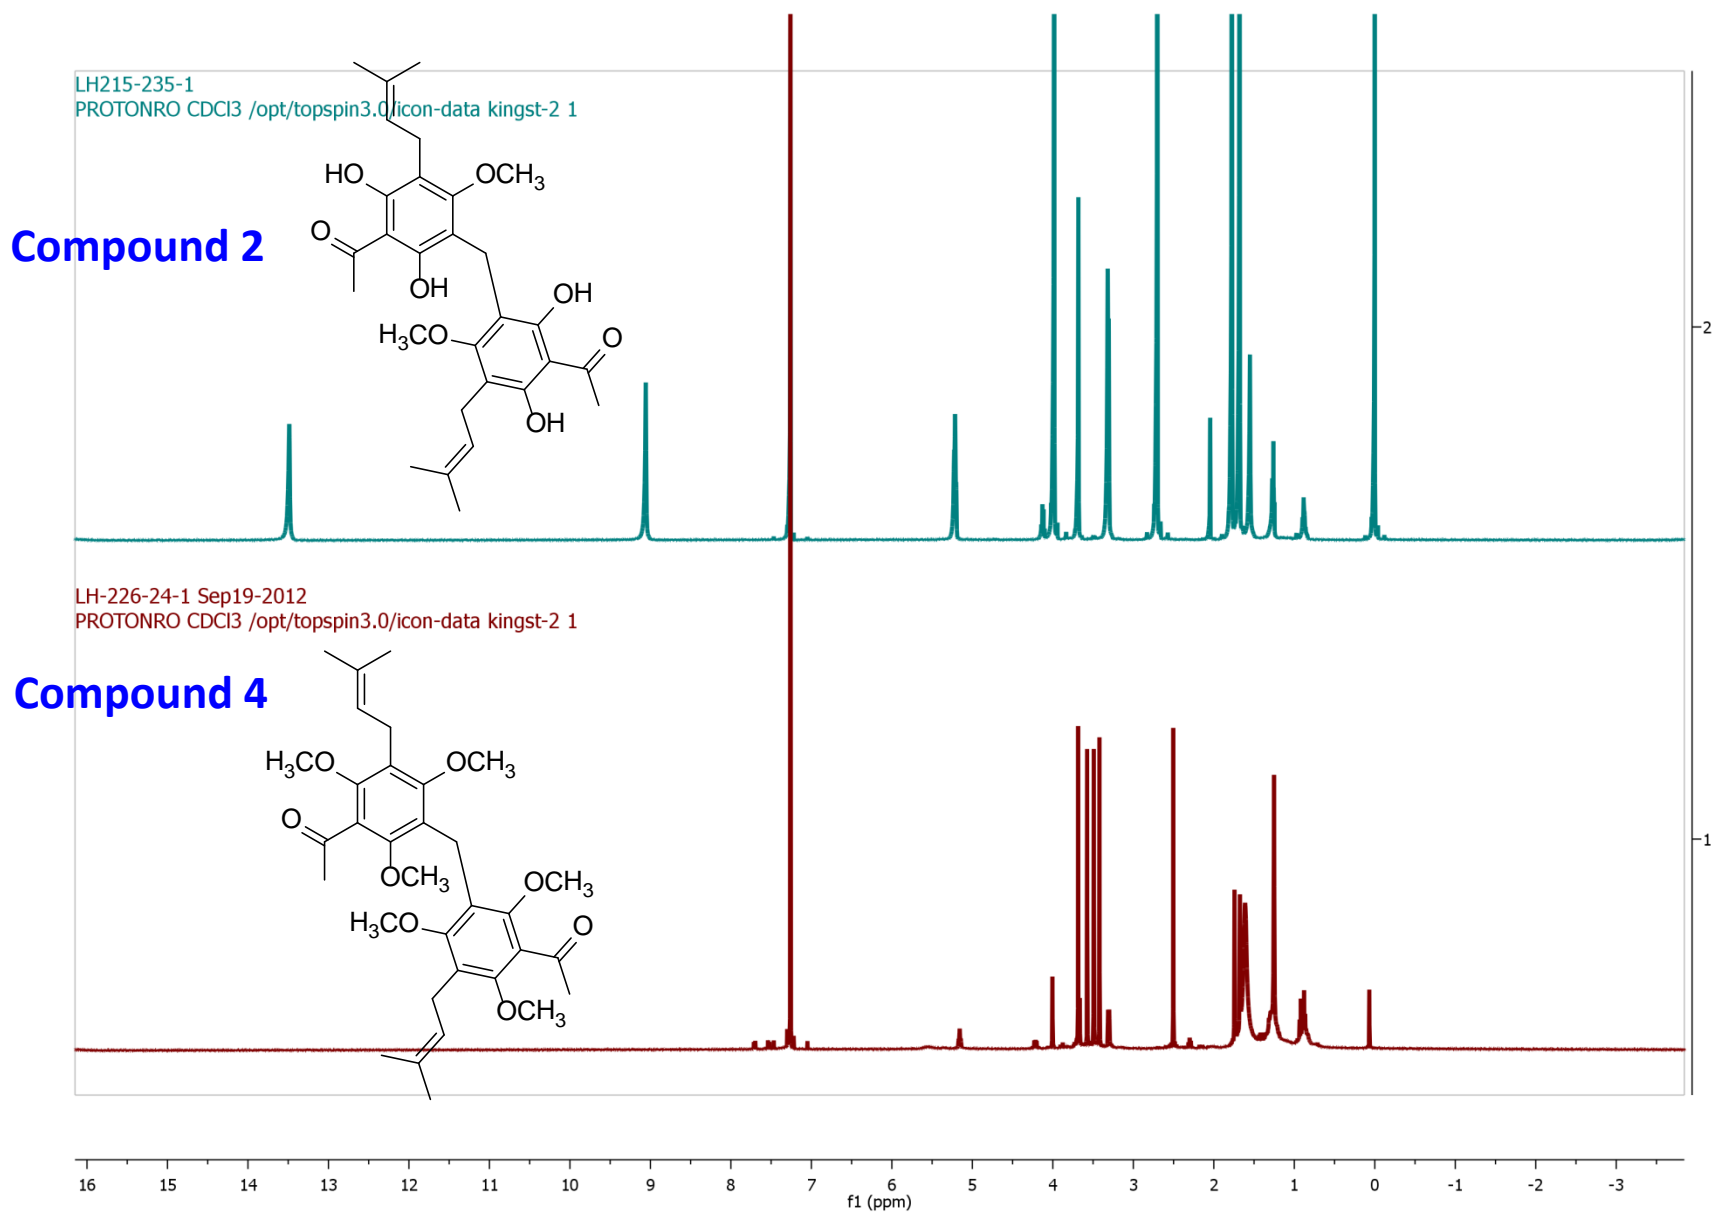

# Chart 6. HRESIMS spectrum of Compound 4

**[M+H]<sup>+</sup> (calculated)**

Chemical Formula: C<sub>33</sub>H<sub>45</sub>O<sub>8</sub>

Exact Mass: 569.3114

|               |                    |             |                      |                 |              |                        |                      |
|---------------|--------------------|-------------|----------------------|-----------------|--------------|------------------------|----------------------|
| Sample Name   | lh_226_1           | Position    | P1-C1                | Instrument Name | Instrument 1 | User Name              |                      |
| Inj Vol       | -1                 | InjPosition |                      | SampleType      | Sample       | IRM Calibration Status | All Ions Missed      |
| Data Filename | lh_226_1_mixed_u.d | ACQ Method  | MMI_mixedpos_union.m | Comment         |              | 431401 Acquired Time   | 9/20/2012 4:21:00 PM |

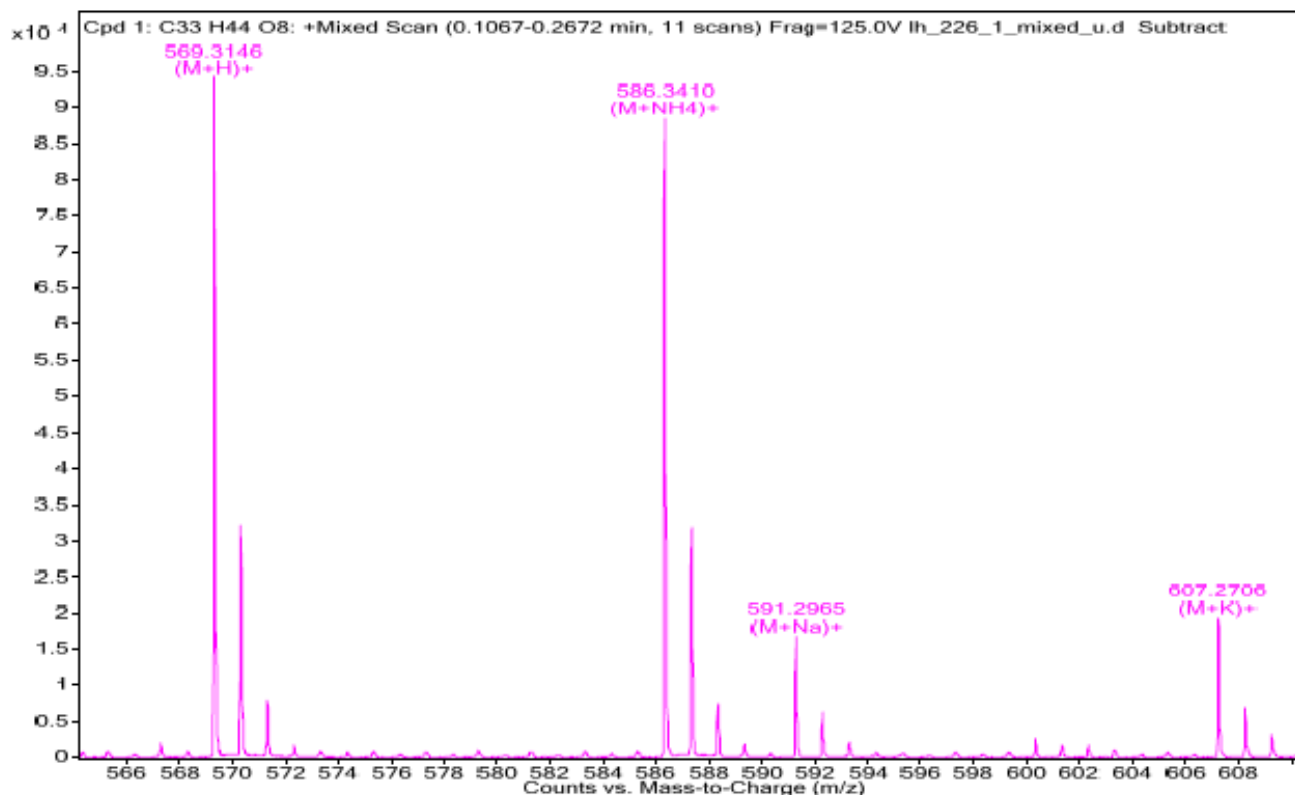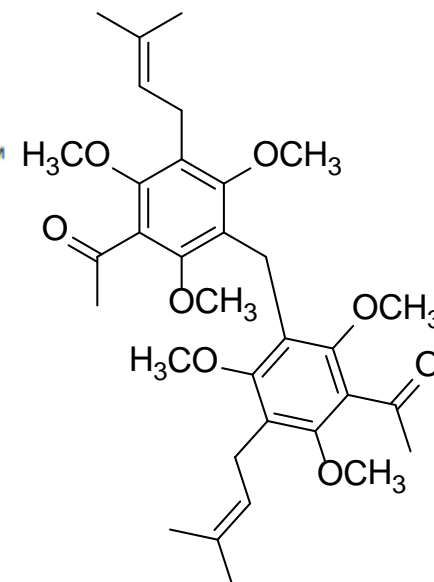

Anisotropic displacement ellipsoid drawing (50%) of **3**.

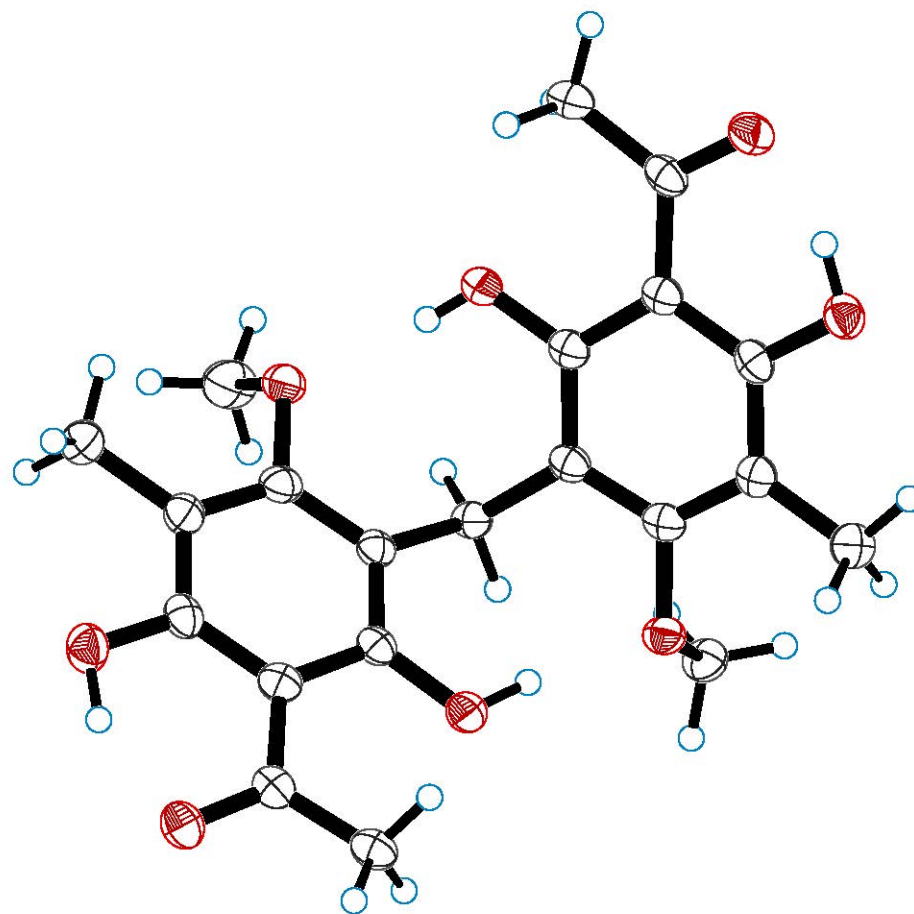

Supplement: NIHMS432705-supplement-1_si_001.pdf [file NIHMS432705-supplement-1_si_001.pdf]
